# Supplementary material
Source: PubMed Central journal article supplement (PMC6687548)
Supplement: NIHMS1527351-supplement-11.pdf [file NIHMS1527351-supplement-11.pdf]

Supplement Table 4. List of proteins differentially regulated by PAX8 in MOSE and OVCAR8 cell lines.

**Proteins with similar regulation by PAX8**

| Protein Symbol | MOSE-PAX8/MOSE-neo (log fold change) | Clone 2/OVCAR8 (log fold change) |
|----------------|--------------------------------------|----------------------------------|
| Aatf           | 1.60                                 | -3.31                            |
| Aco2           | 0.11                                 | -0.95                            |
| Cdh2           | 0.61                                 | -1.90                            |
| Dhfr           | 0.33                                 | -6.64                            |
| Gclm           | 0.44                                 | -1.05                            |
| Hyou1          | -0.13                                | 0.82                             |
| Lrrc57         | -0.52                                | 6.64                             |
| Ppme1          | 0.55                                 | -1.13                            |
| Ppp2ca         | 0.43                                 | -3.38                            |
| Psph           | 0.35                                 | -0.92                            |
| Rplp1          | 0.35                                 | -0.89                            |
| Samm50         | 0.40                                 | -0.97                            |
| Sco2           | 0.74                                 | -6.64                            |
| Txnrd1         | 0.17                                 | -0.98                            |

**Proteins with opposite regulation by PAX8**

|         |       |       |
|---------|-------|-------|
| Abcb7   | 0.73  | 6.64  |
| Capza2  | 0.26  | 1.07  |
| Fth1    | -1.21 | -1.38 |
| Ikbkb   | 1.13  | 0.89  |
| Lamp1   | 0.42  | 0.88  |
| Lamtor2 | 0.28  | 6.64  |
| M6pr    | 0.31  | 0.98  |
| Osbpl3  | 0.99  | 1.96  |
| Polr2d  | 0.54  | 3.16  |
| Sec62   | 0.30  | 1.18  |
| Slc25a4 | 0.14  | 6.64  |
| Tbcc    | 0.29  | 6.64  |
